# Supplementary material for: Genomic adaptations in information processing underpin trophic strategy in a whole-ecosystem nutrient enrichment experiment
Source: eLife journal article supplement (doi:10.7554/elife.49816), 2020-01-28
Supplement: supp [file elife_poa_e49816_Source_data_1.xlsx]

## Sheet: metagenomic summary data
Treatment	Total number of reads	number 16S rRNA genes	number tRNA genes	mean genome size (number of reads)	open reading frame GC content	median ENC of RP	median ENCp of rp	mean ENC of RP	mean ENCp of rp	trophic strategy PCA score	bacteria percentage of total	eukaryote percentage of total	archaea percentage of total	virus percentage of total
Unfertilized	1427610	728	1019	3159.83	0.480965	49.225	48.9191	47.9879	47.4983	-1.27896	92.6678	6.88933	0.424795	0.0181192
Unfertilized	1724306	700	886	3436.15	0.503394	50.0703	50.036	48.8701	48.8594	-1.07828	92.9635	6.73371	0.219981	0.08285
Unfertilized	4753844	714	1097	2656.86	0.487371	52.9727	52.1807	52.0512	51.3367	-2.33571	93.8687	5.95274	0.107149	0.0714328
Unfertilized	1637292	1006	1177	3013.68	0.484655	50.5553	50.4139	49.837	49.5451	-1.18701	94.8145	4.31033	0.835073	0.0400666
Fertilized	1378446	944	1785	3729.26	0.523599	47.5192	47.2579	46.9723	46.9854	1.34532	92.6966	7.00832	0.257349	0.0377149
Fertilized	2178320	1143	1093	3818.28	0.536689	46.3327	46.9699	46.0215	46.642	1.33359	93.0911	6.67568	0.207522	0.0256488
Fertilized	4575094	2318	2276	3938.12	0.550816	46.4981	47.4868	46.0151	47.2123	3.20105	93.6041	6.15951	0.213651	0.0227288

## Sheet: elemental stoichiometry
Date	Treatment	C.mgL	N.mgL	C.uM	N.uM	CN	P.uM	CP	NP	P:C
120627	Unfertilized	4.39632	0.574386	366.36	41.0276	8.9296	1.1136	328.987	36.8423	0.00303964
120627	Unfertilized	2.1525	0.265128	179.375	18.9377	9.47183	0.667418	268.76	28.3746	0.00372079
120627	Unfertilized	1.8678	0.234752	155.65	16.768	9.28258	0.456242	341.157	36.7524	0.0029312
120627	Unfertilized	3.5983	0.579574	299.858	41.3982	7.24327	1.19055	251.866	34.7724	0.00397037
120627	Unfertilized	3.56597	0.472742	297.164	33.7673	8.80035	1.09525	271.321	30.8307	0.00368568
120627	Fertilized	15.7057	2.183	1308.81	155.929	8.39362	5.44231	240.487	28.6512	0.00415823
120627	Fertilized	14.1177	1.93767	1176.47	138.405	8.50023
120627	Fertilized	15.0478	2.05812	1253.98	147.009	8.52999	5.47725	228.944	26.8399	0.00436788
120627	Fertilized	18.9988	2.40308	1583.23	171.648	9.22369	6.3173	250.618	27.1712	0.00399013
120627	Fertilized	16.2226	2.13229	1351.88	152.306	8.87608	5.50875	245.406	27.648	0.00407488

## Sheet: Chlorophyll
ID	Date	Treatment	chlA.ng.ml
120627JCa	120627	Unfertilized	5.02773
120627JCa	120627	Unfertilized	5.74808
120627JCa	120627	Unfertilized	5.54879
120627JCa	120627	Unfertilized	3.35362
120627JCa	120627	Unfertilized	5.5918
120627JPa	120627	Fertilized	42.9337
120627JPa	120627	Fertilized	33.5663
120627JPa	120627	Fertilized	49.6833
120627JPa	120627	Fertilized	64.0086
120627JPa	120627	Fertilized	44.9703
